# Supplementary material for: Effects of long-term use of macrolides in patients with non-cystic fibrosis bronchiectasis: a meta-analysis of randomized controlled trials
Source: PubMed Central journal article supplement (PMC4464873; doi:10.1186/s12879-015-0872-5), 2015-03-27

Figure S2

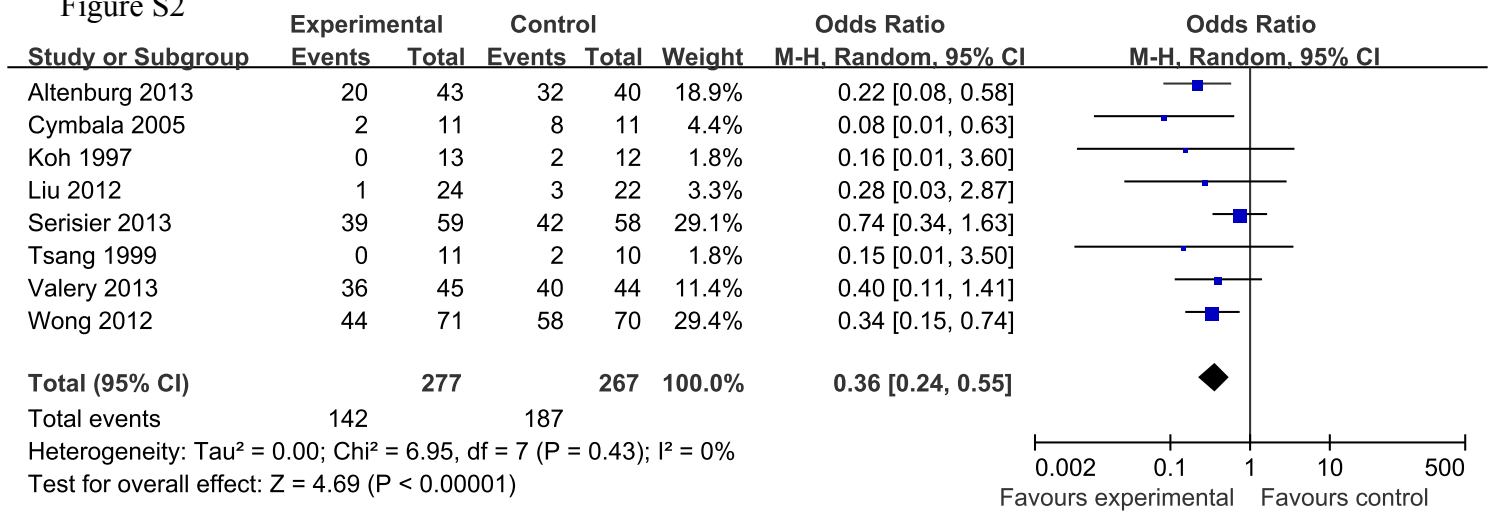

Supplement: 12879_2015_872_MOESM5_ESM.pdf [file 12879_2015_872_MOESM5_ESM.pdf]
